# Supplementary material for: Multi-Edge Gene Set Networks Reveal Novel Insights into Global Relationships between Biological Themes
Source: PLOS journal article supplement (doi:10.1371/journal.pone.0045211), 2012-09-13
Supplement: S2 (10.1371/journal.pone.0045211.s002) [file journal.pone.0045211.s002]

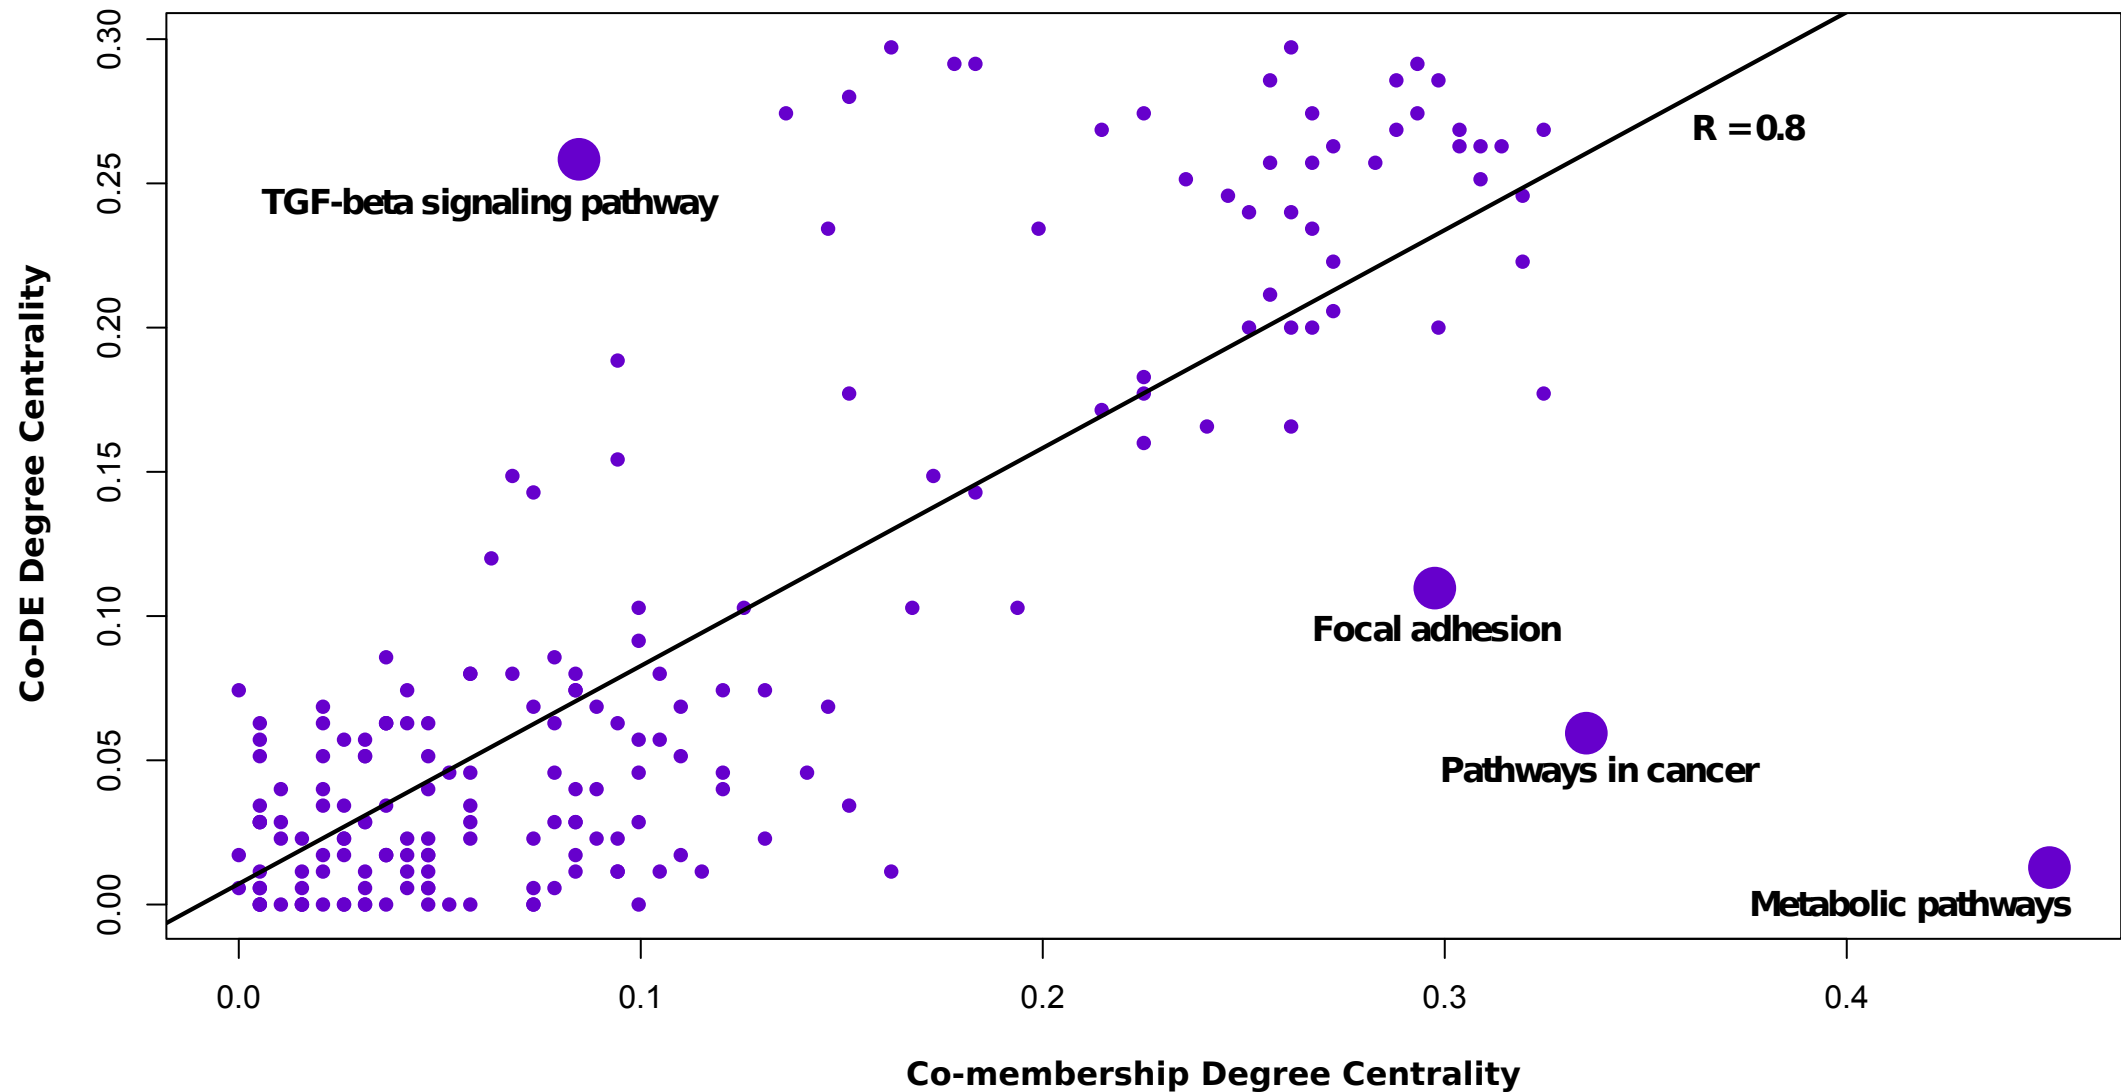

Supplementary Figure 2
