# Supplementary material for: Multi-Edge Gene Set Networks Reveal Novel Insights into Global Relationships between Biological Themes
Source: PLOS journal article supplement (doi:10.1371/journal.pone.0045211), 2012-09-13
Supplement: S4 (10.1371/journal.pone.0045211.s004) [file journal.pone.0045211.s004]

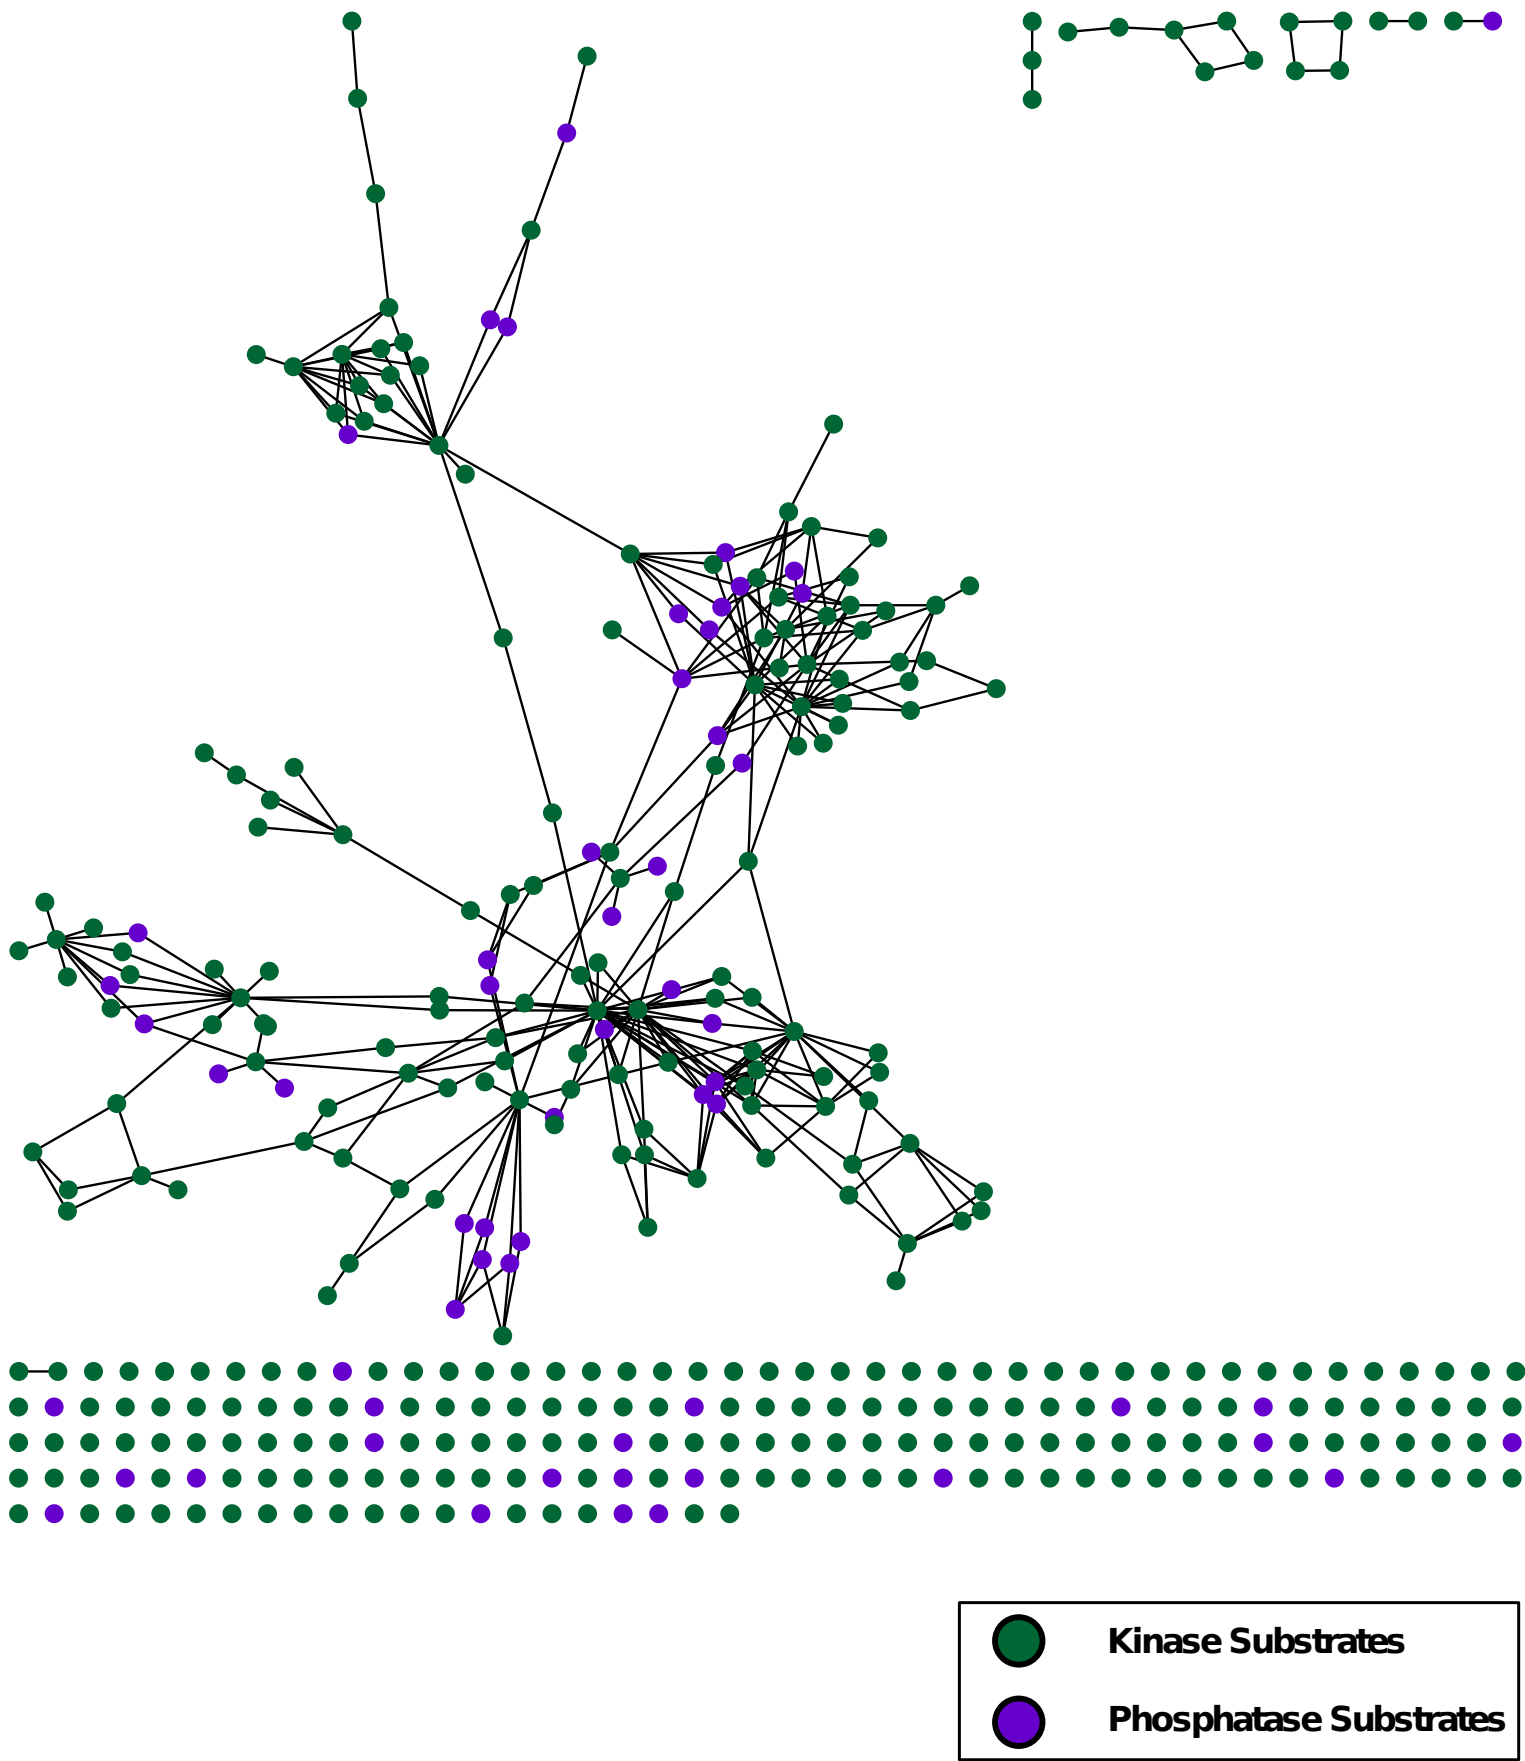

**Supplementary Figure 4**
