# Supplementary material for: Multi-Edge Gene Set Networks Reveal Novel Insights into Global Relationships between Biological Themes
Source: PLOS journal article supplement (doi:10.1371/journal.pone.0045211), 2012-09-13
Supplement: S8 (10.1371/journal.pone.0045211.s008) [file journal.pone.0045211.s008]

| Network                                   | Type                                 | Lower than                      |                                 |                                             | Percent Higher                       |                          | Lower than                  |                             |                                         | Higher than                          |                          | Percent Higher              |                                      |
|-------------------------------------------|--------------------------------------|---------------------------------|---------------------------------|---------------------------------------------|--------------------------------------|--------------------------|-----------------------------|-----------------------------|-----------------------------------------|--------------------------------------|--------------------------|-----------------------------|--------------------------------------|
|                                           |                                      | Mean<br>Overlap<br>(Percentage) | Mean<br>Overlap<br>(Percentage) | Higher than<br>Mean Overlap<br>(Percentage) | Than Mean<br>Overlap<br>(Percentage) | Mean Overlap<br>(Number) | Mean<br>Overlap<br>(Number) | Mean<br>Overlap<br>(Number) | Higher than<br>Mean Overlap<br>(Number) | Than Mean<br>Overlap<br>(Percentage) | Mean Overlap<br>(Number) | Mean<br>Overlap<br>(Number) | Than Mean<br>Overlap<br>(Percentage) |
| biological_process_50_10_200              | coenrichment_differential_expression | 7.23%                           | 1395                            | 457                                         | 24.68%                               | 1.646016                 | 1324                        | 528                         | 28.51%                                  |                                      |                          |                             |                                      |
| cellular_component_50_10_200              | coenrichment_differential_expression | 9.03%                           | 59                              | 22                                          | 27.16%                               | 1.867211                 | 50                          | 31                          | 38.27%                                  |                                      |                          |                             |                                      |
| Chromosome_map                            | coenrichment_differential_expression | 0.00%                           | 182                             | 0                                           | 0.00%                                | 0                        | 182                         | 0                           | 0.00%                                   |                                      |                          |                             |                                      |
| KEGG                                      | coenrichment_differential_expression | 19.25%                          | 1033                            | 523                                         | 33.61%                               | 10.490748                | 976                         | 580                         | 37.28%                                  |                                      |                          |                             |                                      |
| Kinase_substrates__Phosphatase_substrates | coenrichment_differential_expression | 29.97%                          | 50                              | 0                                           | 0.00%                                | 2.49127                  | 47                          | 3                           | 6.00%                                   |                                      |                          |                             |                                      |
| molecular_function_50_10_200              | coenrichment_differential_expression | 9.96%                           | 62                              | 19                                          | 23.46%                               | 2.374667                 | 60                          | 21                          | 25.93%                                  |                                      |                          |                             |                                      |
| WikiPathways                              | coenrichment_differential_expression | 15.34%                          | 585                             | 396                                         | 40.37%                               | 5.68078                  | 609                         | 372                         | 37.92%                                  |                                      |                          |                             |                                      |
|                                           |                                      |                                 |                                 | <b>Average</b>                              | <b>21.32%</b>                        |                          |                             | <b>Average</b>              | <b>24.84%</b>                           |                                      |                          |                             |                                      |
| biological_process_50_10_200              | comembership                         | 7.23%                           | 0                               | 1261                                        | 100.00%                              | 1.646016                 | 0                           | 1261                        | 100.00%                                 |                                      |                          |                             |                                      |
| cellular_component_50_10_200              | comembership                         | 9.03%                           | 0                               | 128                                         | 100.00%                              | 1.867211                 | 0                           | 128                         | 100.00%                                 |                                      |                          |                             |                                      |
| KEGG                                      | comembership                         | 19.25%                          | 803                             | 1294                                        | 61.71%                               | 10.490748                | 842                         | 1255                        | 59.85%                                  |                                      |                          |                             |                                      |
| Kinase_substrates__Phosphatase_substrates | comembership                         | 29.97%                          | 141                             | 854                                         | 85.83%                               | 2.49127                  | 111                         | 884                         | 88.84%                                  |                                      |                          |                             |                                      |
| molecular_function_50_10_200              | comembership                         | 9.96%                           | 0                               | 140                                         | 100.00%                              | 2.374667                 | 3                           | 137                         | 97.86%                                  |                                      |                          |                             |                                      |
| VirusMINT                                 | comembership                         | 51.21%                          | 19                              | 36                                          | 65.45%                               | 2.58589                  | 8                           | 47                          | 85.45%                                  |                                      |                          |                             |                                      |
| WikiPathways                              | comembership                         | 15.34%                          | 155                             | 672                                         | 81.26%                               | 5.68078                  | 228                         | 599                         | 72.43%                                  |                                      |                          |                             |                                      |
|                                           |                                      |                                 |                                 | <b>Average</b>                              | <b>84.89%</b>                        |                          |                             | <b>Average</b>              | <b>86.35%</b>                           |                                      |                          |                             |                                      |
| biological_process_50_10_200              | linkage_ppi                          | 7.23%                           | 179                             | 43                                          | 19.37%                               | 1.646016                 | 176                         | 46                          | 20.72%                                  |                                      |                          |                             |                                      |
| cellular_component_50_10_200              | linkage_ppi                          | 9.03%                           | 92                              | 22                                          | 19.30%                               | 1.867211                 | 89                          | 25                          | 21.93%                                  |                                      |                          |                             |                                      |
| KEGG                                      | linkage_ppi                          | 19.25%                          | 365                             | 116                                         | 24.12%                               | 10.490748                | 333                         | 148                         | 30.77%                                  |                                      |                          |                             |                                      |
| Kinase_substrates__Phosphatase_substrates | linkage_ppi                          | 29.97%                          | 284                             | 53                                          | 15.73%                               | 2.49127                  | 281                         | 56                          | 16.62%                                  |                                      |                          |                             |                                      |
| molecular_function_50_10_200              | linkage_ppi                          | 9.96%                           | 164                             | 34                                          | 17.17%                               | 2.374667                 | 167                         | 31                          | 15.66%                                  |                                      |                          |                             |                                      |
| VirusMINT                                 | linkage_ppi                          | 51.21%                          | 31                              | 1                                           | 3.13%                                | 2.58589                  | 25                          | 7                           | 21.88%                                  |                                      |                          |                             |                                      |
| WikiPathways                              | linkage_ppi                          | 15.34%                          | 311                             | 152                                         | 32.83%                               | 5.68078                  | 313                         | 150                         | 32.40%                                  |                                      |                          |                             |                                      |
|                                           |                                      |                                 |                                 | <b>Average</b>                              | <b>18.81%</b>                        |                          |                             | <b>Average</b>              | <b>22.85%</b>                           |                                      |                          |                             |                                      |
