# Supplementary material for: Multi-Edge Gene Set Networks Reveal Novel Insights into Global Relationships between Biological Themes
Source: PLOS journal article supplement (doi:10.1371/journal.pone.0045211), 2012-09-13
Supplement: S9 (10.1371/journal.pone.0045211.s009) [file journal.pone.0045211.s009]

| Brain Related?       | Title                                                                                                                                                                                                             | Author                  | Journal/Year                   | PubMed ID     |
|----------------------|-------------------------------------------------------------------------------------------------------------------------------------------------------------------------------------------------------------------|-------------------------|--------------------------------|---------------|
| Directly related     | Soluble epoxide inhibition is protective against cerebral ischemia via vascular and neural protection.                                                                                                            | Simpkins AN et al.      | Am J Pathol. 2009              | PMID:19435785 |
| Directly related     | Genomic deletions correlate with underexpression of novel candidate genes at six loci in pediatric pilocytic astrocytoma.                                                                                         | Potter N et al.         | Neoplasia. 2008                | PMID:18670637 |
| Directly related     | A genetic association analysis of cognitive ability and cognitive ageing using 325 markers for 109 genes associated with oxidative stress or cognition.                                                           | Harris SE et al.        | BMC Genet. 2007                | PMID:17601350 |
| Directly related     | The commonality of protein interaction networks determined in neurodegenerative disorders (NDDs).                                                                                                                 | Limviphuvadh V et al.   | Bioinformatics. 2007           | PMID:17553855 |
| Directly related     | Adaptation of energy metabolism in breast cancer brain metastases.                                                                                                                                                | Chen EI et al.          | Cancer Res. 2007               | PMID:17308085 |
| Directly related     | Biomarker discovery: a proteomic approach for brain cancer profiling.                                                                                                                                             | Khalil AA. et al.       | Cancer Sci. 2007               | PMID:17233837 |
| Directly related     | IFN-beta down-regulates the expression of DNA repair gene MGMT and sensitizes resistant glioma cells to temozolomide.                                                                                             | Natsume A et al.        | Cancer Res. 2005               | PMID:16140920 |
| Directly related     | Gene regulation and DNA damage in the ageing human brain.                                                                                                                                                         | Lu T et al.             | Nature. 2004                   | PMID:15190254 |
| Directly related     | Incipient Alzheimer's disease: microarray correlation analyses reveal major transcriptional and tumor suppressor responses.                                                                                       | Blalock EM et al.       | Proc Natl Acad Sci U S A. 2004 | PMID:14769913 |
| Directly related     | Genome-wide gene expression profiles of the developing mouse hippocampus.                                                                                                                                         | Mody M et al.           | Proc Natl Acad Sci U S A. 2001 | PMID:11438693 |
| Indirectly related   | Integrative analysis reveals the direct and indirect interactions between DNA copy number aberrations and gene expression changes.                                                                                | Lee H et al.            | Bioinformatics. 2008           | PMID:18263644 |
| Indirectly related   | Transcriptional and phenotypic comparisons of Ppara knockout and siRNA knockdown mice.                                                                                                                            | De Souza AT et al.      | Nucleic Acids Res. 2006        | PMID:16945951 |
| Indirectly related   | Systematic identification of human mitochondrial disease genes through integrative genomics.                                                                                                                      | Calvo S et al.          | Nat Genet. 2006                | PMID:16582907 |
| Indirectly related   | Adaptation and increased susceptibility to infection associated with constitutive expression of misfolded SP-C.                                                                                                   | Bridges JP et al.       | J Cell Biol. 2006              | PMID:16449190 |
| Indirectly related   | Differentiation stage-dependent preferred uptake of basolateral (systemic) glutamine into Caco-2 cells results in its accumulation in proteins with a role in cell-cell interaction.                              | Lenaerts K et al.       | FEBS J. 2005                   | PMID:15978041 |
| Indirectly related   | Analysis of double-stranded RNA-induced apoptosis pathways using interferon-response noninducible small interfering RNA expression vector library.                                                                | Matsumoto S et al.      | J Biol Chem. 2005              | PMID:15845550 |
| Indirectly related   | A transcriptional profile of aging in the human kidney.                                                                                                                                                           | Rodwell GE et al.       | PLoS Biol. 2004                | PMID:15562319 |
| Indirectly related   | Functional gene expression analysis of clonal plasma cells identifies a unique molecular profile for light chain amyloidosis.                                                                                     | Abraham RS et al.       | Blood. 2005                    | PMID:15388584 |
| Indirectly related   | Microarray analysis of differentiation-specific gene expression during 3T3-L1 adipogenesis.                                                                                                                       | Burton GR et al.        | Gene. 2004                     | PMID:15033539 |
| Indirectly related   | Identification of the apoptosis activation cascade induced in mammary carcinomas by energy restriction.                                                                                                           | Thompson HJ et al.      | Cancer Res. 2004               | PMID:14973070 |
| Indirectly related   | Stemness": transcriptional profiling of embryonic and adult stem cells."                                                                                                                                          | Ramalho-Santos M et al. | Science. 2002                  | PMID:12228720 |
| Indirectly related   | Systematic screen for human disease genes in yeast.                                                                                                                                                               | Steinmetz LM et al.     | Nat Genet. 2002                | PMID:12134146 |
| Indirectly related   | Influences of aging and caloric restriction on the transcriptional profile of skeletal muscle from rhesus monkeys.                                                                                                | Kayo T et al.           | Proc Natl Acad Sci U S A. 2001 | PMID:11309484 |
| Liver                | Genomic and proteomic analysis reveals a threshold level of MYC required for tumor maintenance.                                                                                                                   | Shachaf CM et al.       | Cancer Res. 2008               | PMID:18593912 |
| Liver                | Epigenetics of gene expression in human hepatoma cells: expression profiling the response to inhibition of DNA methylation and histone deacetylation.                                                             | Dannenberg LO et al.    | BMC Genomics. 2006             | PMID:16854234 |
| Liver                | Integrating time-course microarray gene expression profiles with cytotoxicity for identification of biomarkers in primary rat hepatocytes exposed to cadmium.                                                     | Tan Y et al.            | Bioinformatics. 2006           | PMID:16249259 |
| Unrelated cancer     | Integrated analysis of DNA methylation and gene expression reveals specific signaling pathways associated with platinum resistance in ovarian cancer.                                                             | Li M et al.             | BMC Med Genomics. 2009         | PMID:19505326 |
| Unrelated cancer     | Genetic variants in apoptosis and immunoregulation-related genes are associated with risk of chronic lymphocytic leukemia.                                                                                        | Enjuanes A et al.       | Cancer Res. 2008               | PMID:19074885 |
| Unrelated cancer     | Evolutionary origins of human apoptosis and genome-stability gene networks.                                                                                                                                       | Castro MA et al.        | Nucleic Acids Res. 2008        | PMID:18832373 |
| Unrelated cancer     | Ganoderma lucidum polysaccharides in human monocytic leukemia cells: from gene expression to network construction.                                                                                                | Cheng KC et al.         | BMC Genomics. 2007             | PMID:17996095 |
| Unrelated cancer     | Comparative analysis of genes regulated in acute myelomonocytic leukemia with and without inv(16)(p13q22) using microarray techniques, real-time PCR, immunohistochemistry, and flow cytometry immunophenotyping. | Sun X et al.            | Mod Pathol. 2007               | PMID:17571080 |
| Unrelated cancer     | Analysis of gene expression identifies PLAB as a mediator of the apoptotic activity of fenretinide in human ovarian cancer cells.                                                                                 | Appierto V et al.       | Oncogene. 2007                 | PMID:17213814 |
| Unrelated cancer     | The expression of FHIT, PCNA and EGFR in benign and malignant breast lesions.                                                                                                                                     | Terry G et al.          | Br J Cancer. 2007              | PMID:17164758 |
| Unrelated cancer     | Identification of differentially expressed genes in cutaneous squamous cell carcinoma by microarray expression profiling.                                                                                         | Nindl I et al.          | Mol Cancer. 2006               | PMID:16893473 |
| Unrelated non-cancer | Progress towards in vivo use of siRNAs.                                                                                                                                                                           | Behlke MA. et al.       | Mol Ther. 2006                 | PMID:16481219 |
| Unrelated non-cancer | Global gene expression in human myocardium-oligonucleotide microarray analysis of regional diversity and transcriptional regulation in heart failure.                                                             | Kaab S et al.           | J Mol Med (Berl). 2004         | PMID:15103417 |
